# Supplementary material for: Friction Dynamics of Denim Fabrics with Washing or Polishing Treatment
Source: Research Square preprint supplement (doi:10.21203/rs.3.rs-7719155/v1), 2025-10-09
Supplement: Supplementary file 1 [file 2293e28f0fc99ad3c909c8d9.docx]

Supporting information

Friction Dynamics of Denim Fabrics with Washing or Polishing Treatment

Rintaro Kawakami 1, Ken Miyata 2, Syuji Kobayashi 2, Mitsumasa Kimata 1, Yoshimune Nonomura 1

1 Department of Applied Chemistry, Chemical Engineering, and Biochemical Engineering, Graduate School of Science and Engineering, Yamagata University, 4-3-16 Jonan, Yonezawa 992-8510, Japan

2 Department of Organic Materials Science, Graduate School of Organic Materials Science, Yamagata University, 4-3-16 Jonan, Yonezawa 992-8510, Japan

**Table S2** Laser microscope image of each fabric.

| Sample | **R** | **O** | **S** | **C1** | **W** | **C2** |
| --- | --- | --- | --- | --- | --- | --- |
| ×5 | 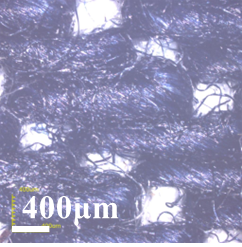 | 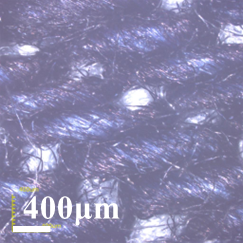 | 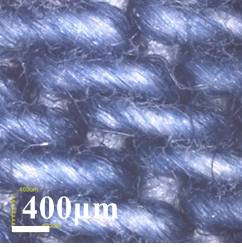 | 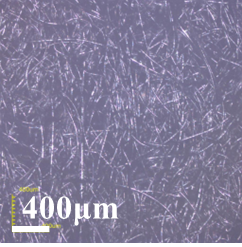 | 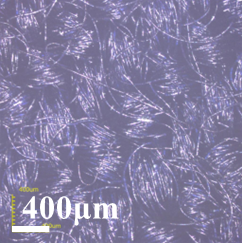 | 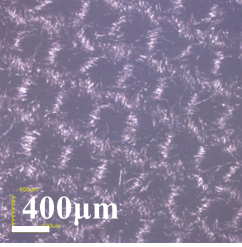 |
| ×10 | 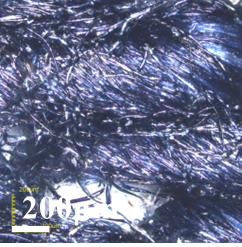 | 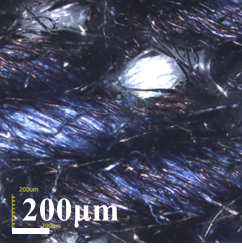 | 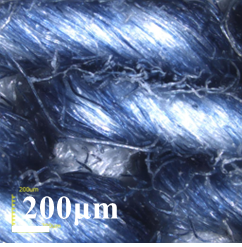 | 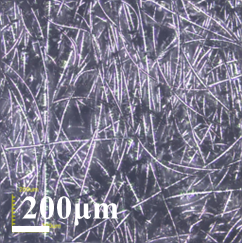 | 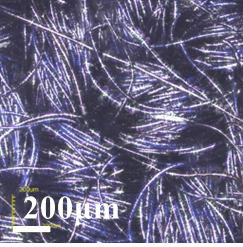 | 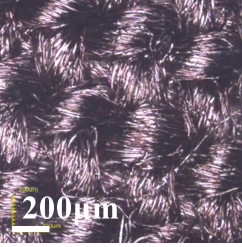 |
| ×20 | 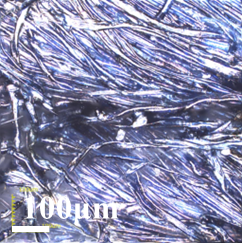 | 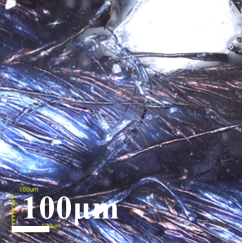 | 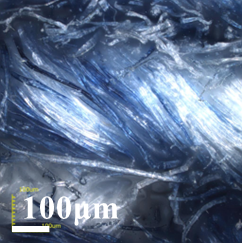 | 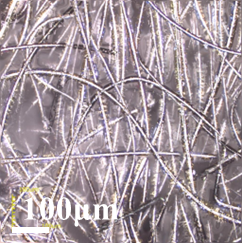 | 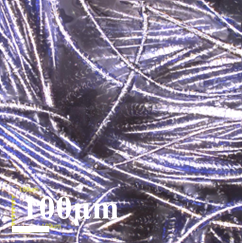 | 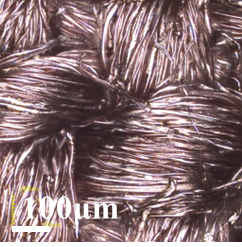 |
| ×50 | 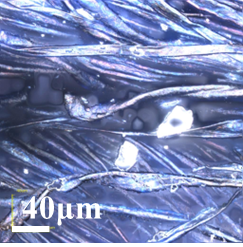 | 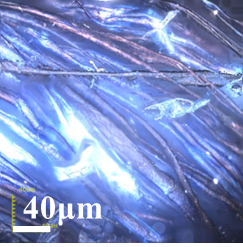 | 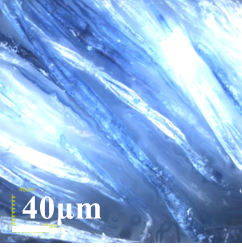 | 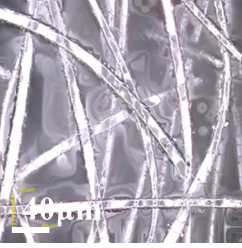 | 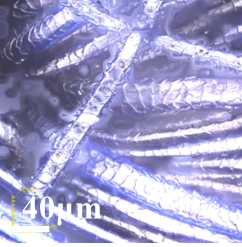 | 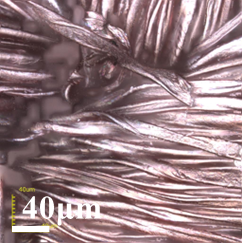 |
| ×100 | 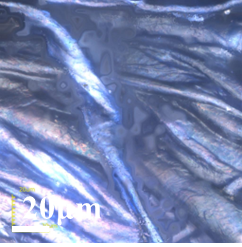 | 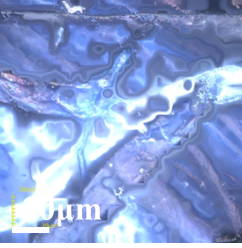 | 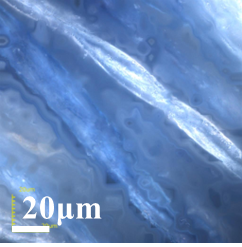 | 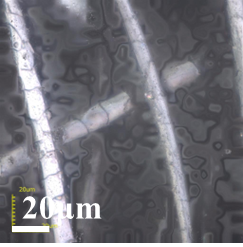 | 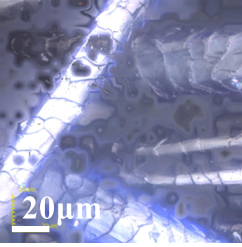 | 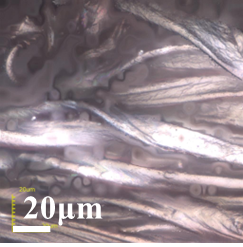 |


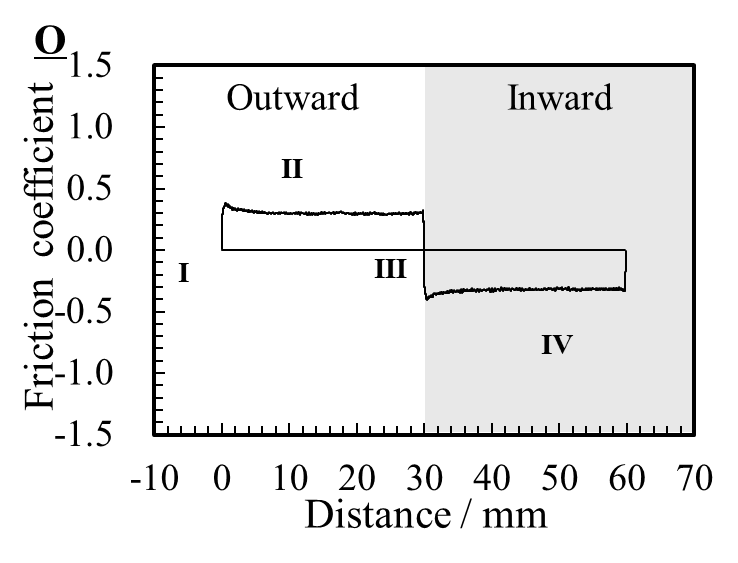

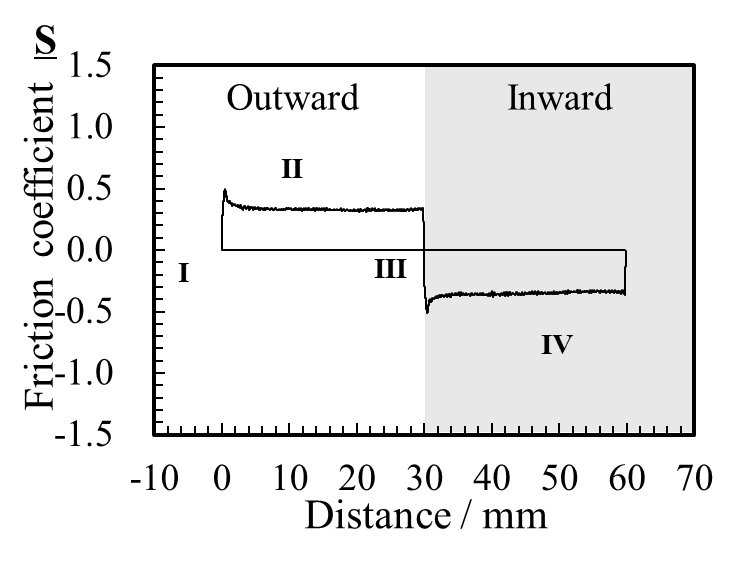

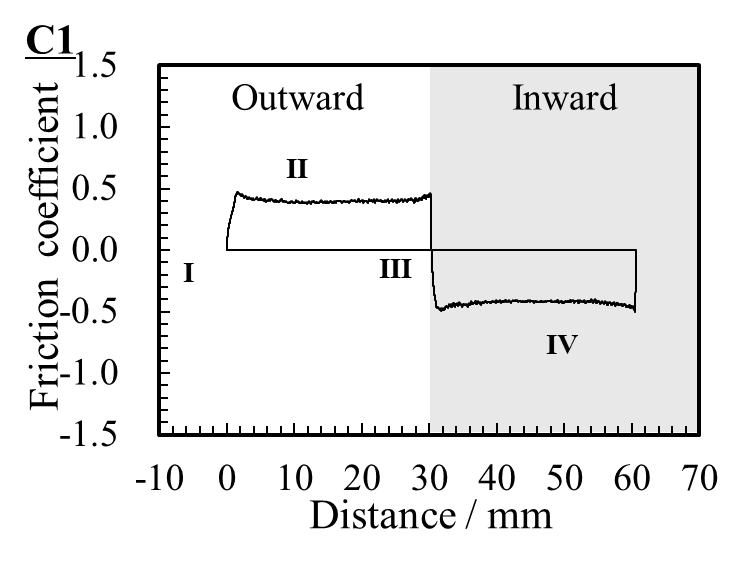

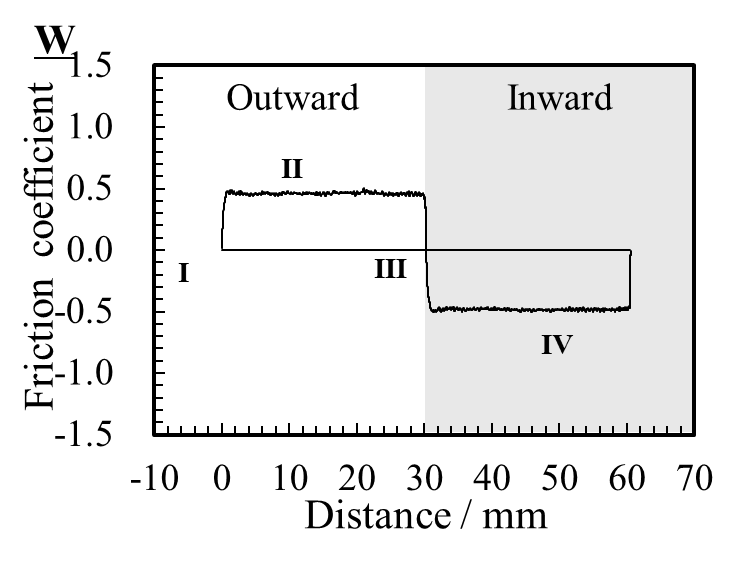


**
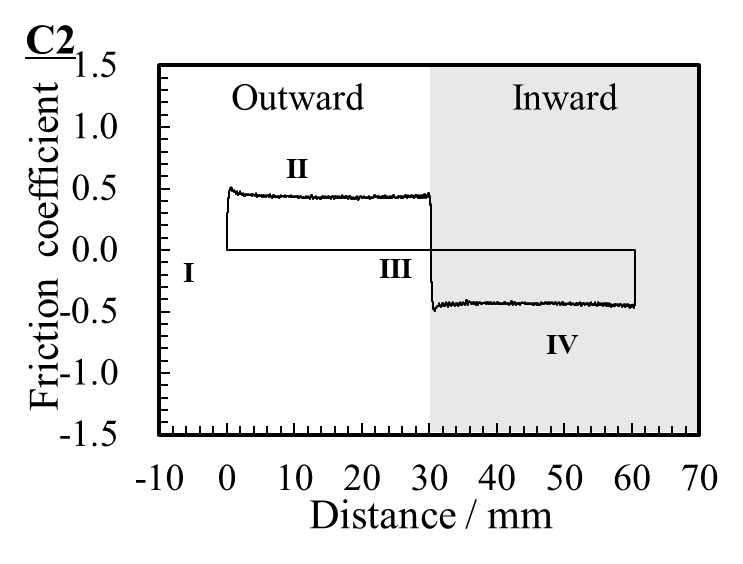
**

**Fig S1** Relationship between friction coefficient and distance during vertical rubbing of front side of fabrics at *ω* = 2.1 rad s−1 and *W* = 0.98 N.

**
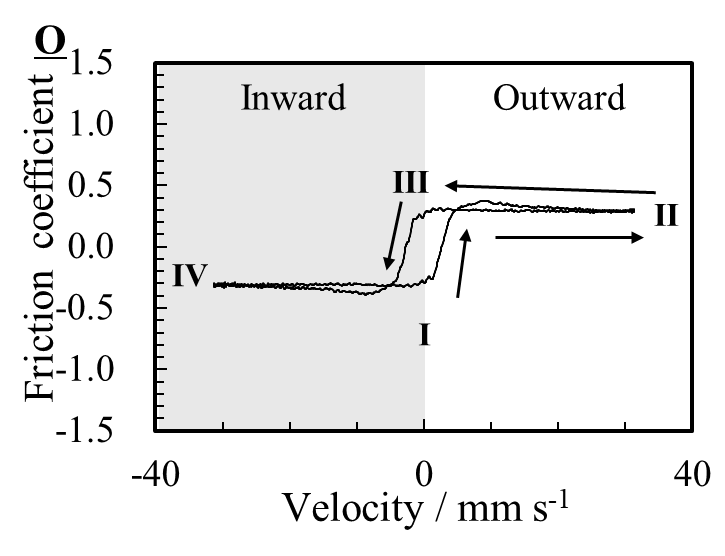

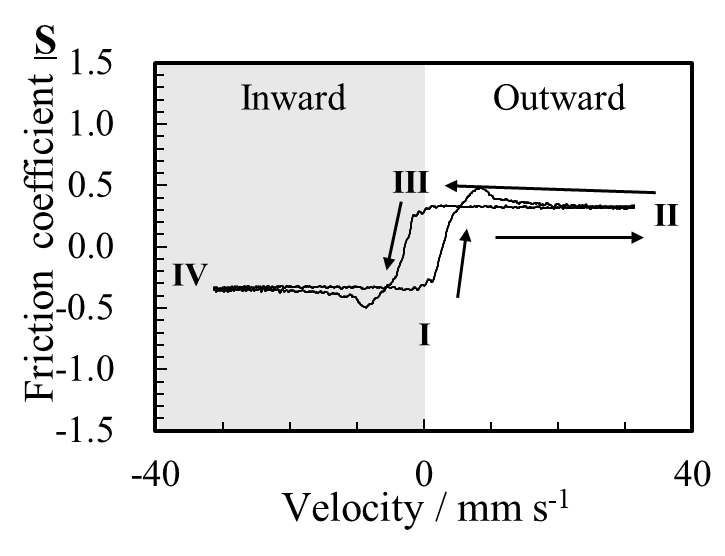

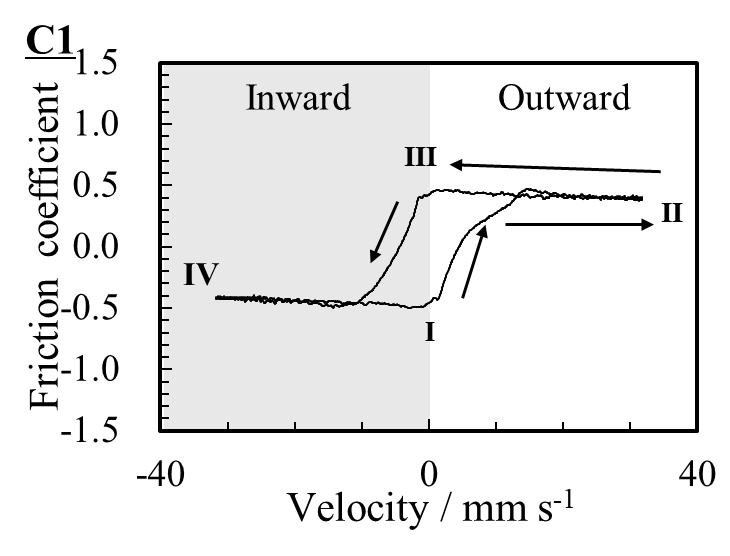

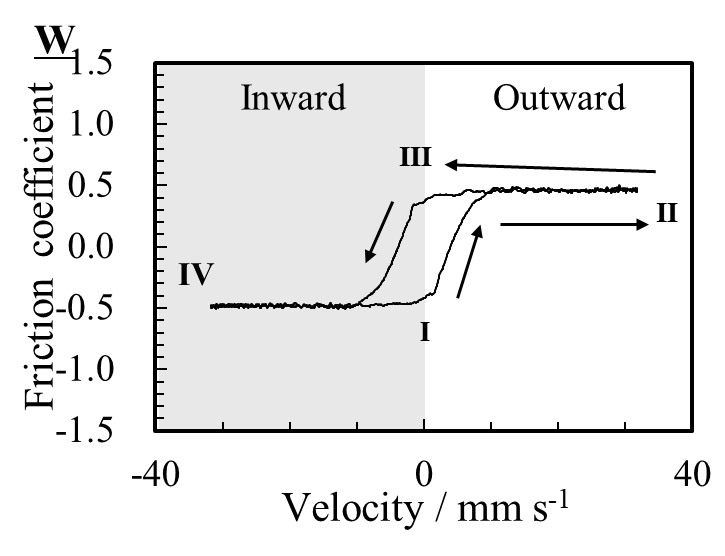

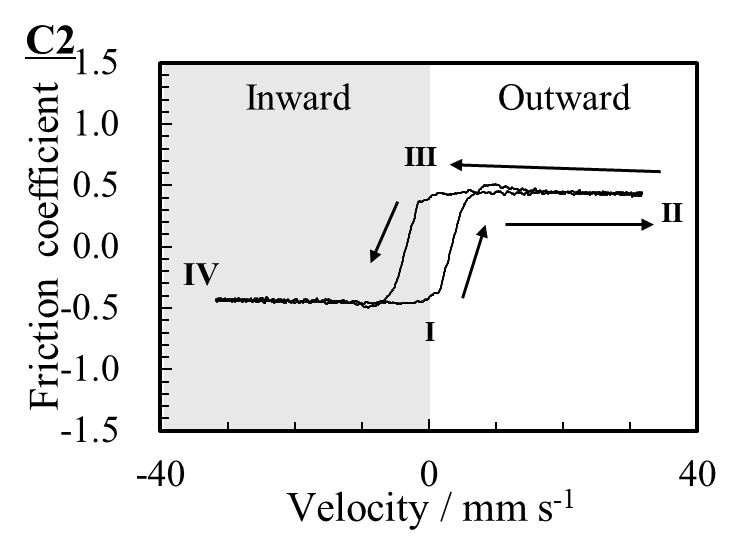
**

**Fig S2** Relationship between friction coefficient and velocity during vertical rubbing of front side of fabrics at *ω* = 2.1 rad s−1 and *W* = 0.98 N.
